# Supplementary material
Source: PubMed Central journal article supplement (PMC5047106)
Supplement: supp_pp.16.00965_PP2016-00965R1_Supplemental_Material.pdf [file supp_pp.16.00965_PP2016-00965R1_Supplemental_Material.pdf]

Table S1. Oligonucleotide primers used in the reported studies.

|     | Primer Name              | Primer (5'-3')                             |
|-----|--------------------------|--------------------------------------------|
| P1  | ORM1compF                | ATGCCTGCAGATGGCGAATCTGTATGTGAAAGC          |
| P2  | ORM1compR                | ATGCCTCGAGTTATTTATCACCATTGATACCAAAGATGCGTA |
| P3  | ORM2compF                | ATGCCTGCAGATGTACGTAAGAGCACTTCCGAC          |
| P4  | ORM2compR                | ATGCCTCGAGTCATTGGTCTCCATTGATTCCAATAT       |
| P5  | AtORM1qPCRset (Qiagen)   | Cat. No. QT00866887                        |
| P6  | AtORM2qPCRset (Qiagen)   | Cat. No. QT00736792                        |
| P7  | AtPP2AA3qPCRset (Qiagen) | Cat. No. QT00857220                        |
| P8  | ORM1cDNAF                | CTGATTGAAGAAGAAATGGCGAATC                  |
| P9  | ORM1cDNAR                | TTATTTATCACCATTGATACC                      |
| P10 | ORM2cDNAF                | ATGTACGTAAGAGCACTTCC                       |
| P11 | ORM2cDNAR                | TCATTGGTCTCCATTGATTCC                      |
| P12 | ORM1promoterF            | ATGCGGATCCCTTTGGCTGCACTCCTCTCT             |
| P13 | ORM1promoterR            | ATGCGAATTCTTCTTCTTCAATCAGATCGGATCG         |
| P14 | ORM2promoterF            | ATGCGGATCCTGATGATCCACCATGATTTT             |
| P15 | ORM2promoterR            | ATGCGAATTCGCTTTTTCCACGGAGGGA               |
| P16 | ORM1yfpF                 | ATGCGAGCTCATGGCGAATCTGTATGTGAA             |
| P17 | ORM1yfpR                 | ATGCGGTACCTTTATCACCATTGATACCAA             |
| P18 | ORM2yfpF                 | ATGCGAGCTCATGTACGTAAGAGCACTTCC             |
| P19 | ORM2yfpR                 | ATGCGGTACCTTGGTCTCCATTGATTCCAA             |
| P20 | SALK_046054L             | TAGTCCGTTACACATCACCGG                      |
| P21 | SALK_046054R             | GTTGGCTCGTTGTTCTCTCTG                      |
| P22 | GK_143A01L               | TGCTTATTCCAAGTCCCATG                       |
| P23 | GK_143A01R               | TCCTAATTCGAAGCCTGATCC                      |
| P24 | SAIL_1286_D09L           | TCCTCAGAAATACGATGTTATTTCC                  |
| P25 | SAIL_1286_D09R           | GGATTTGGAAGAAGATCGGAG                      |
| P26 | LBb1.3                   | ATTTTGCCGATTTCCGAAC                        |
| P27 | SAIL T-DNA               | GCTTCTATTATATCTTCCCAAATTACC                |
| P28 | GAB T-DNA                | CCCATTTGGACGTGAATGTAGACAC                  |
| P29 | ORM1OEF                  | ATGCGAATTCATGGCGAATCTGTATGTGA              |
| P30 | ORM1OER                  | ATGCTCTAGATTATTTATCACCATTG                 |
| P31 | ORM2OEF                  | ATGCGAATTCATGTACGTAAGAGCACTTC              |
| P32 | ORM2OER                  | ATGCTCTAGATCATTGGTCTCCATTGA                |
| P33 | ORM1RNAiF                | TAATTCTAGACTCGAGATGGCGAATCTGTATGTGAA       |
| P34 | ORM1RNAiR                | TATAAAGCTTACTAGTGCGGGTAAGCTGTTGACCAT       |
| P35 | ORM2RNAiF                | TAATTCTAGACTCGAGATGTACGTAAGAGCACTTCC       |
| P36 | ORM2RNAiR                | TATAAAGCTTACTAGTCGGTGAGAAATTTGCGATTAC      |
| P37 | pINTF                    | GAATTCAATACGACTCACTATAGGGCGAA              |
| P38 | pINTR                    | TCTAGAAGCGCGCAATTAACCCCTCAC                |
| P39 | C144WF                   | TATGGGGTCGGTTCTTGGGGCCCTCGTGGATTC          |
| P40 | C144WR                   | GAATCCACGAGGCCCCCAAGAACCGACCCCAT           |

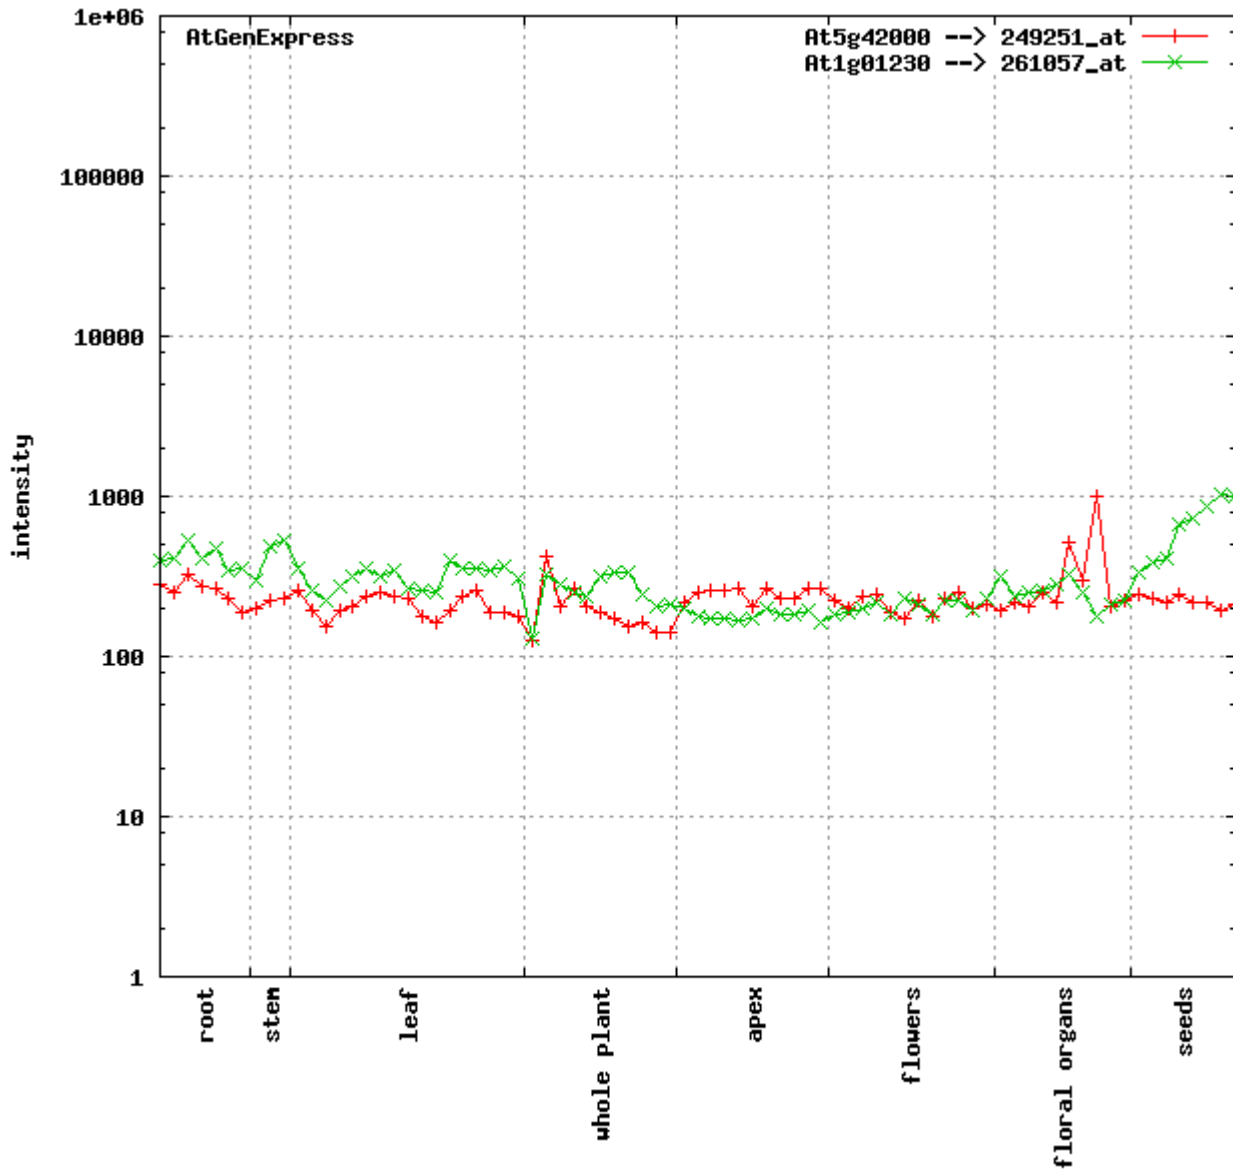

**Figure S1.** Gene expression levels for *AtORM1* (At1g01230) and *AtORM2* (At5g42000) in different tissue types. *AtORM1* is more highly expressed in tissues outside floral organs and seems predominately expressed in developing seed. *AtORM2* appears more highly expressed in floral tissues. Data shown are from: Schmid M, Davison TS, Henz SR, Pape UJ, Demar M, Vingron M, Scholkopf B, Weigel D, Lohmann JU (2005) A gene expression map of *Arabidopsis thaliana* development. *Nat Genet* 37: 501-506

**A**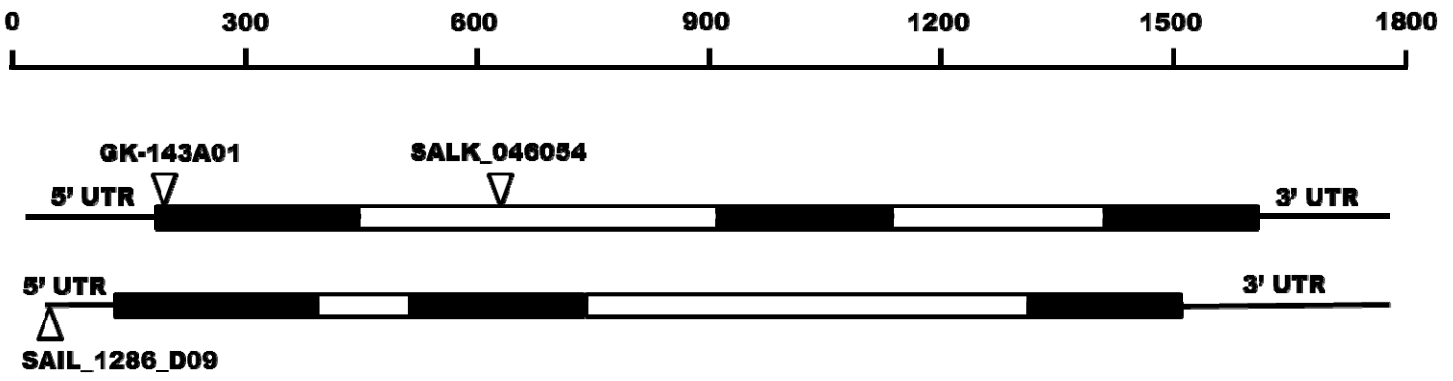**B**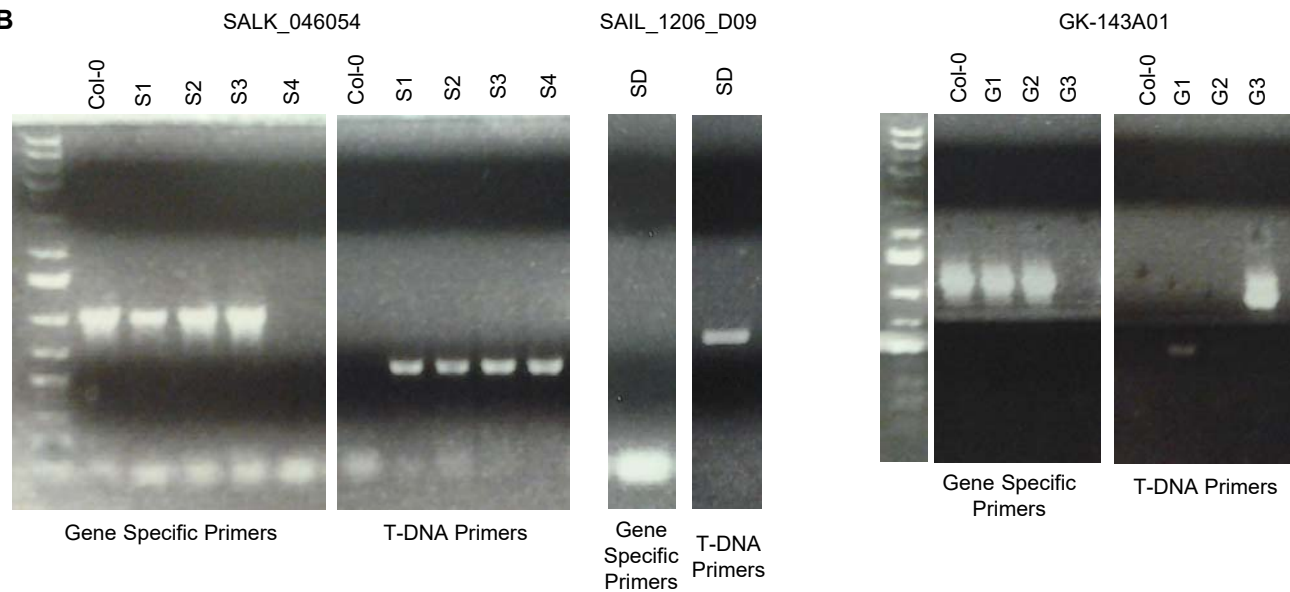**C**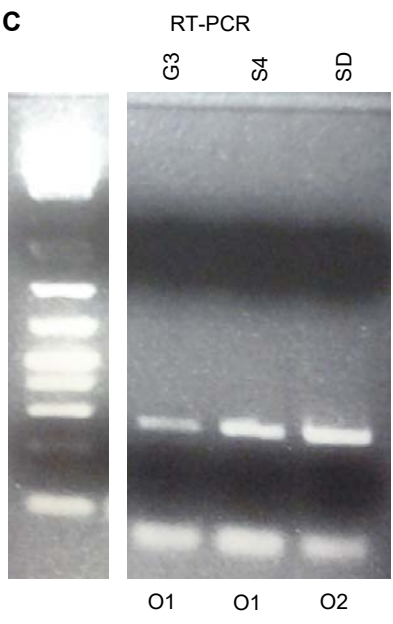

**Figure S2.** Genotyping of T-DNA mutants for *AtORM1* and *AtORM2*. The gene structures for three T-DNA mutant lines are displayed in **(A)**. Introns are shown as white boxes, exons are shown as black boxes, and the UTR regions are shown as black lines. Homozygous T-DNA mutants can be identified for SALK\_046054 and GK-143A01 lines for *AtORM1*, and SAIL\_1286\_D09 line for *AtORM2* **(B)**. T-DNA insertion mutant alleles were confirmed through PCR based genotyping. Genotyping was done using two primer pairs, one pair with two gene specific primers and another pair with one T-DNA specific primer and one gene specific primer, these primers can be found in Supplementary Table 1. These homozygous mutant lines still contain full length transcript as confirmed through RT-PCR using full length cDNA primer pairs found in Supplementary Table 1 **(C)**.

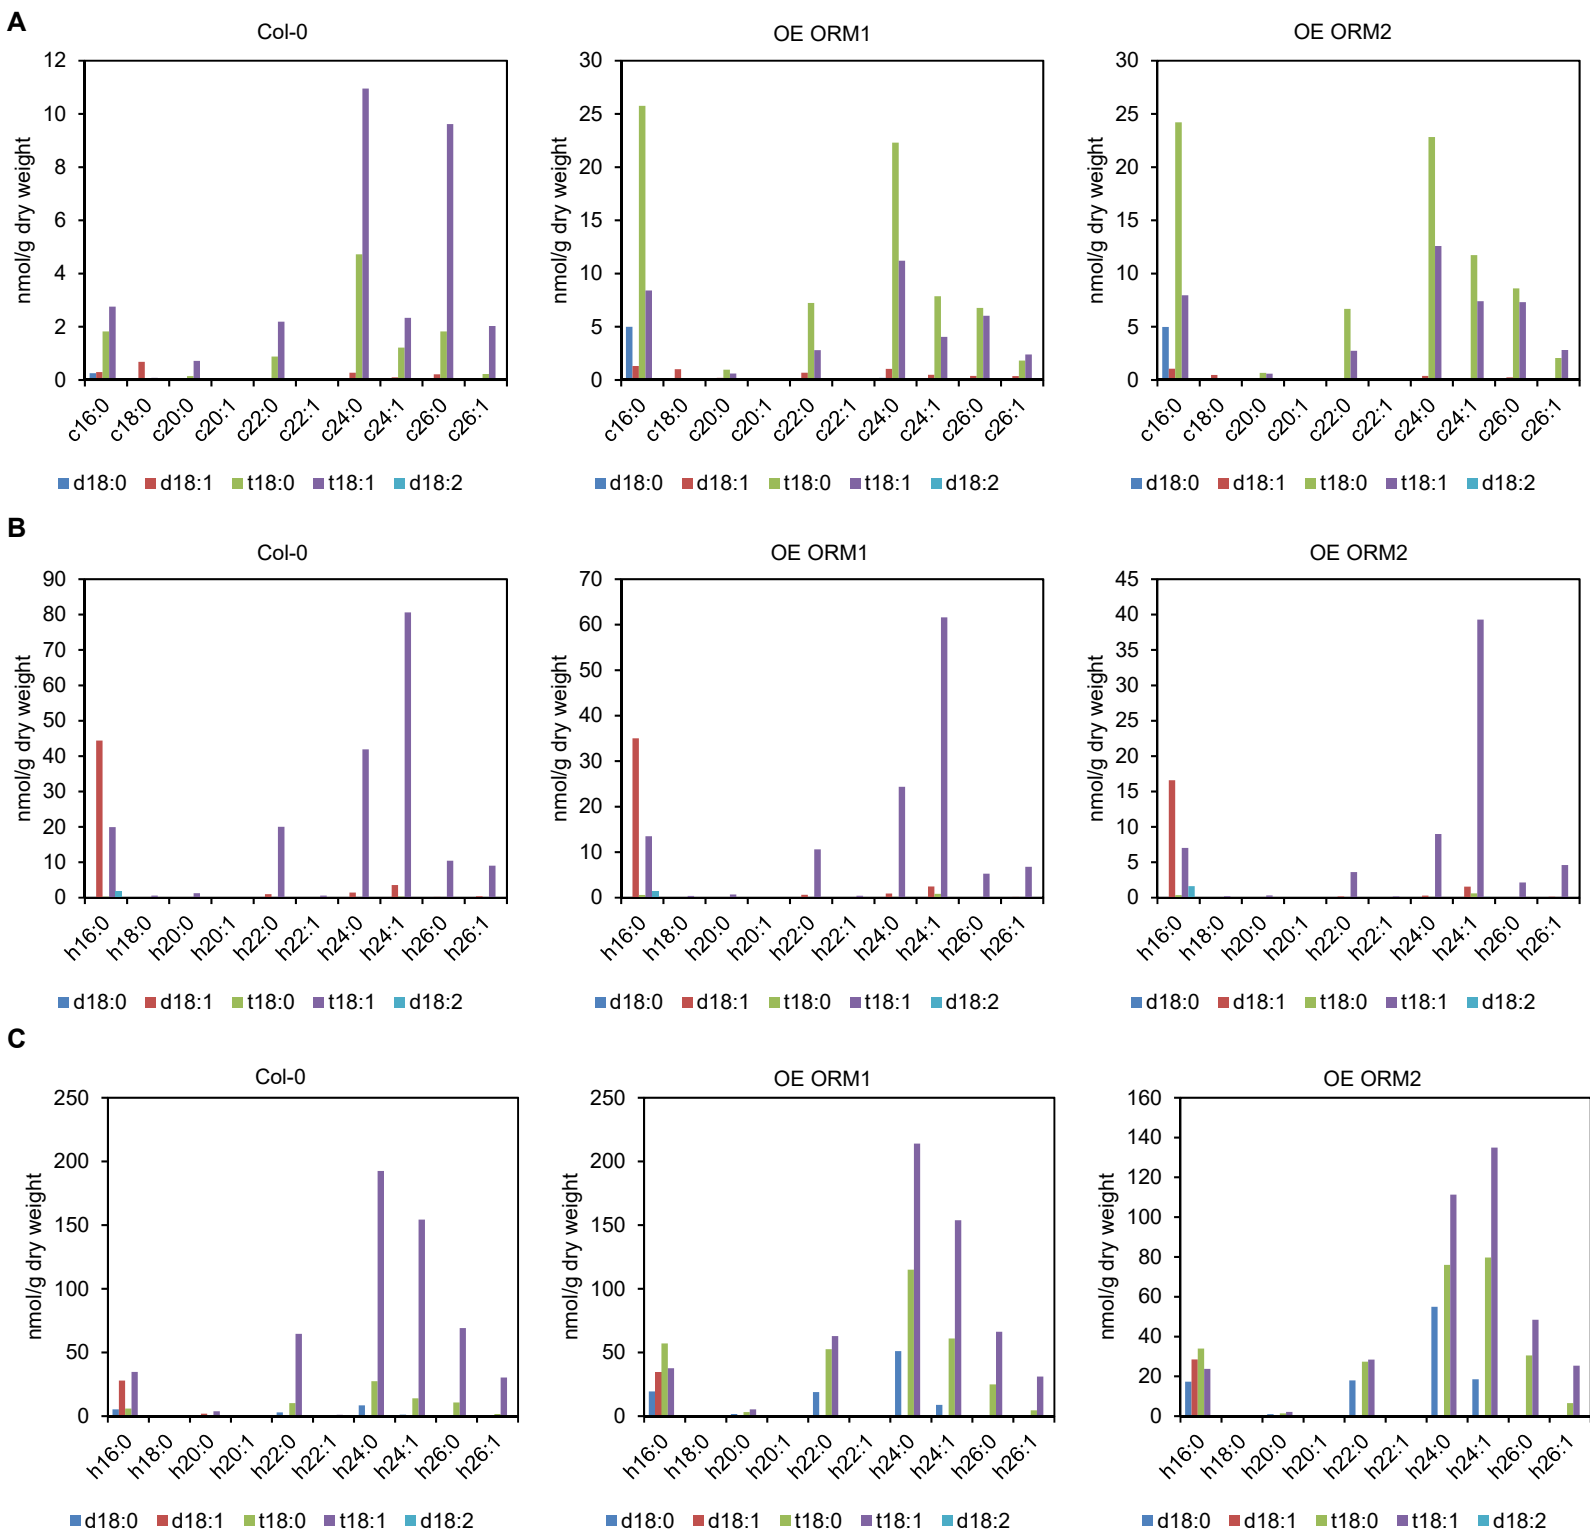

**Figure S3.** Spingolipid profile of *AtORM1* and *AtORM2* overexpression lines that display the dwarf phenotype. Ceramide profiles are shown in **(A)**, glucosylceramide profiles are shown in **(B)**, and GIPC profiles are shown in **(C)**.  $n=1$  sample of leaf tissue.

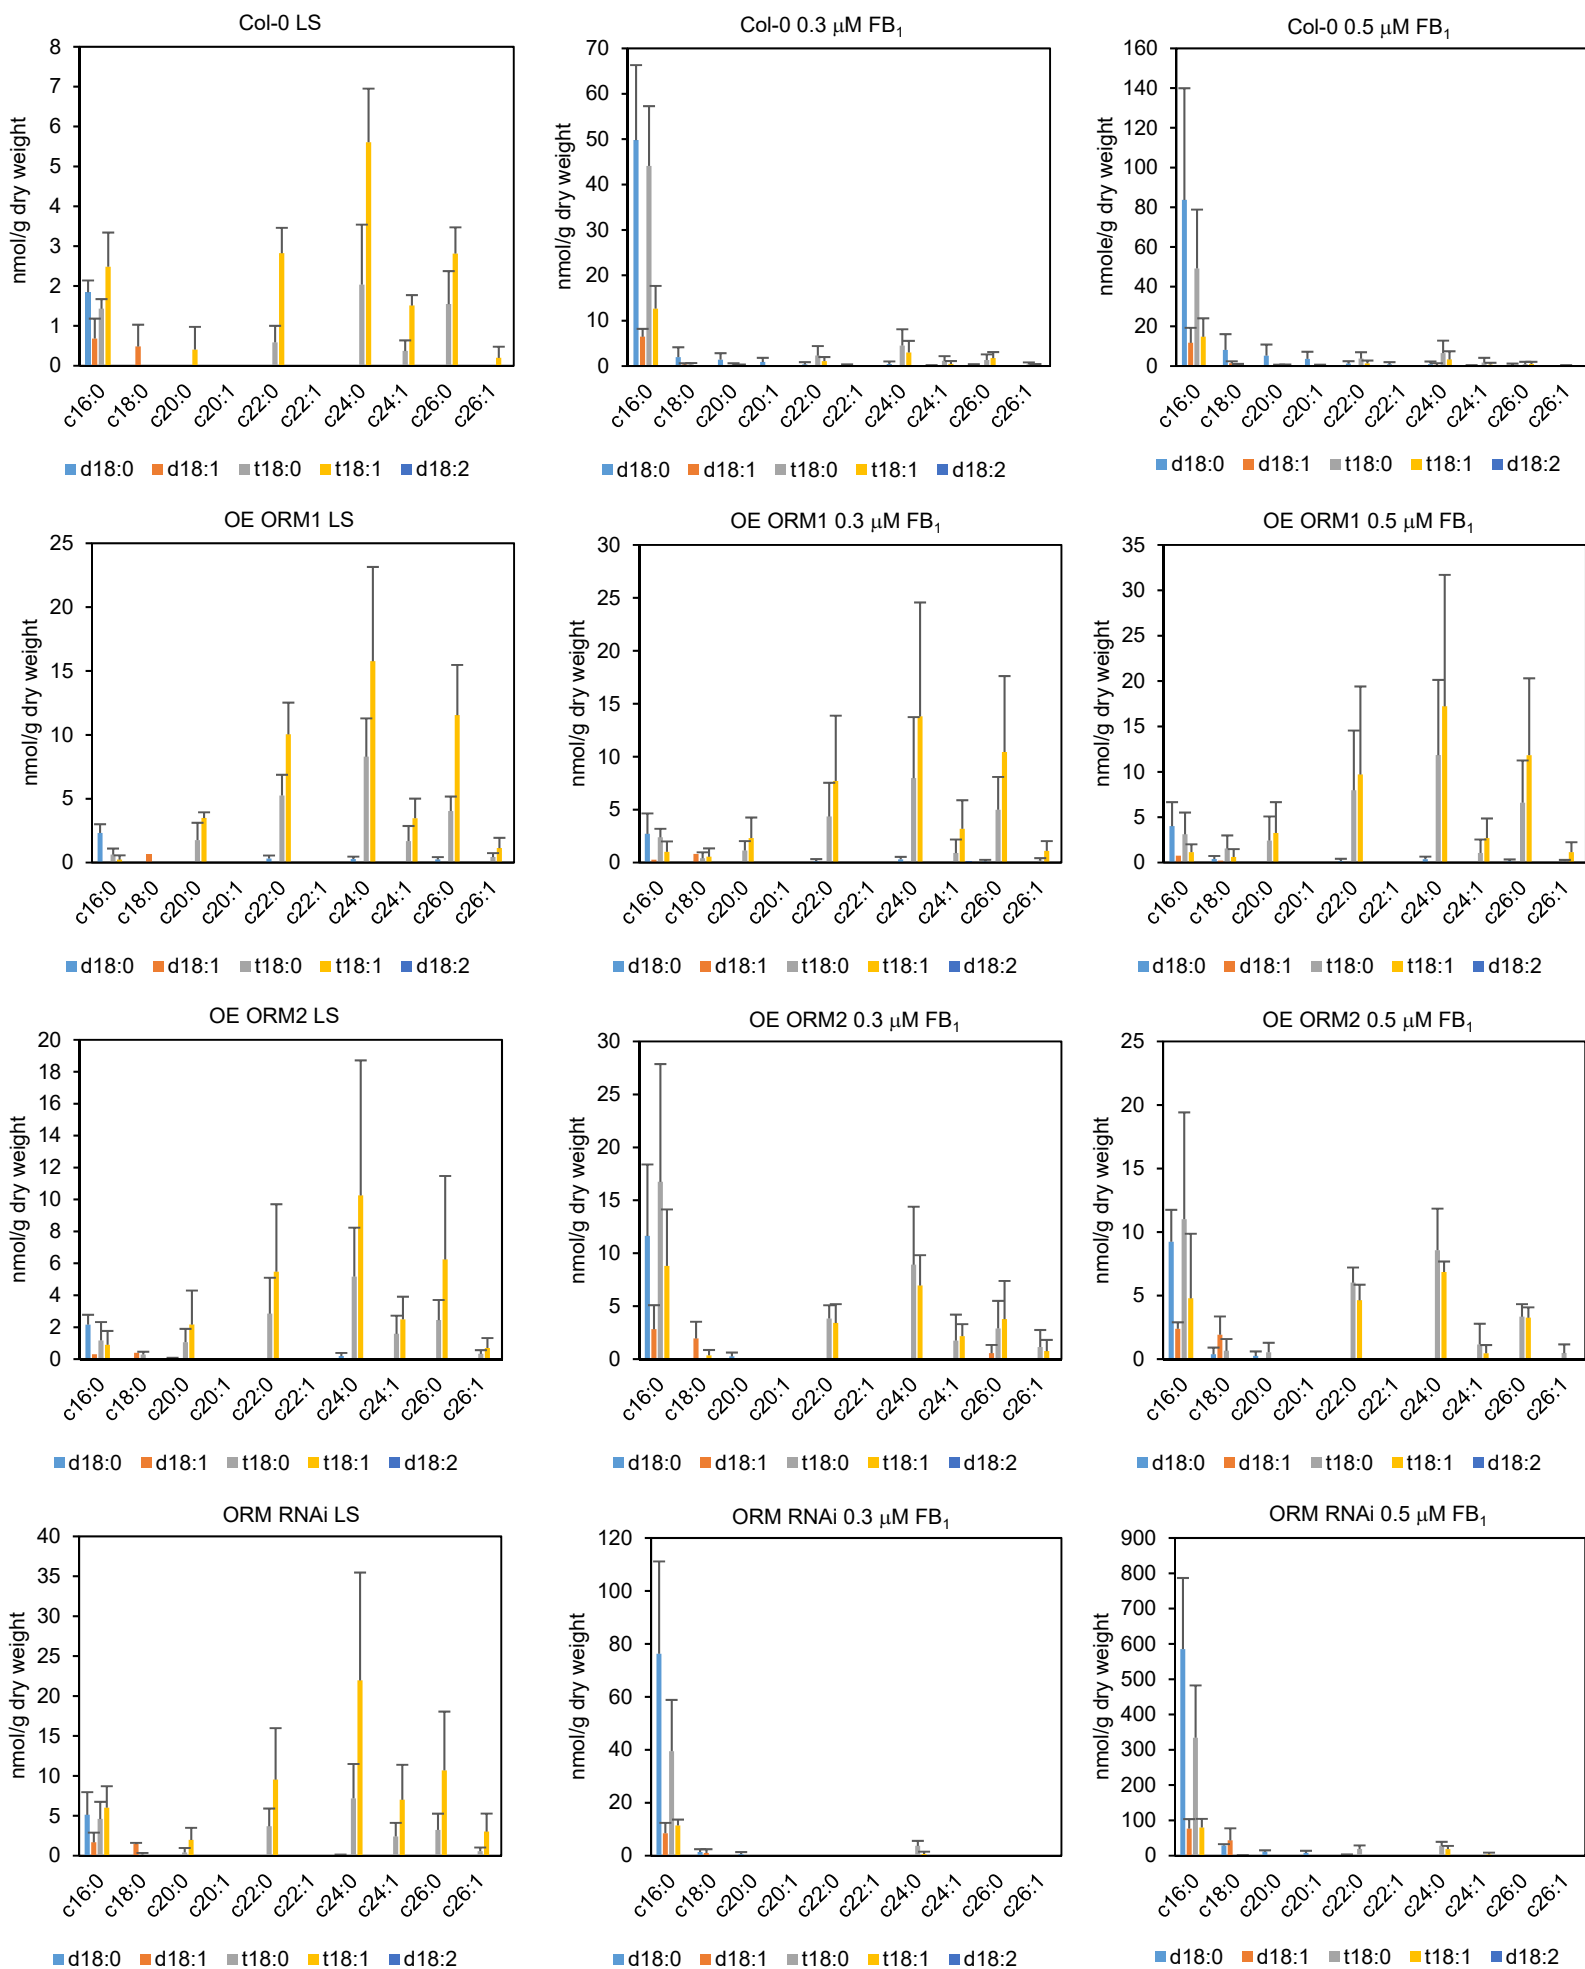

**Figure S4.** Ceramide profile for Col-0 and AtORM overexpression and RNAi lines grown on LS media  $\pm$ FB<sub>1</sub>. n=3 independent analyses of seedlings  $\pm$  SD.

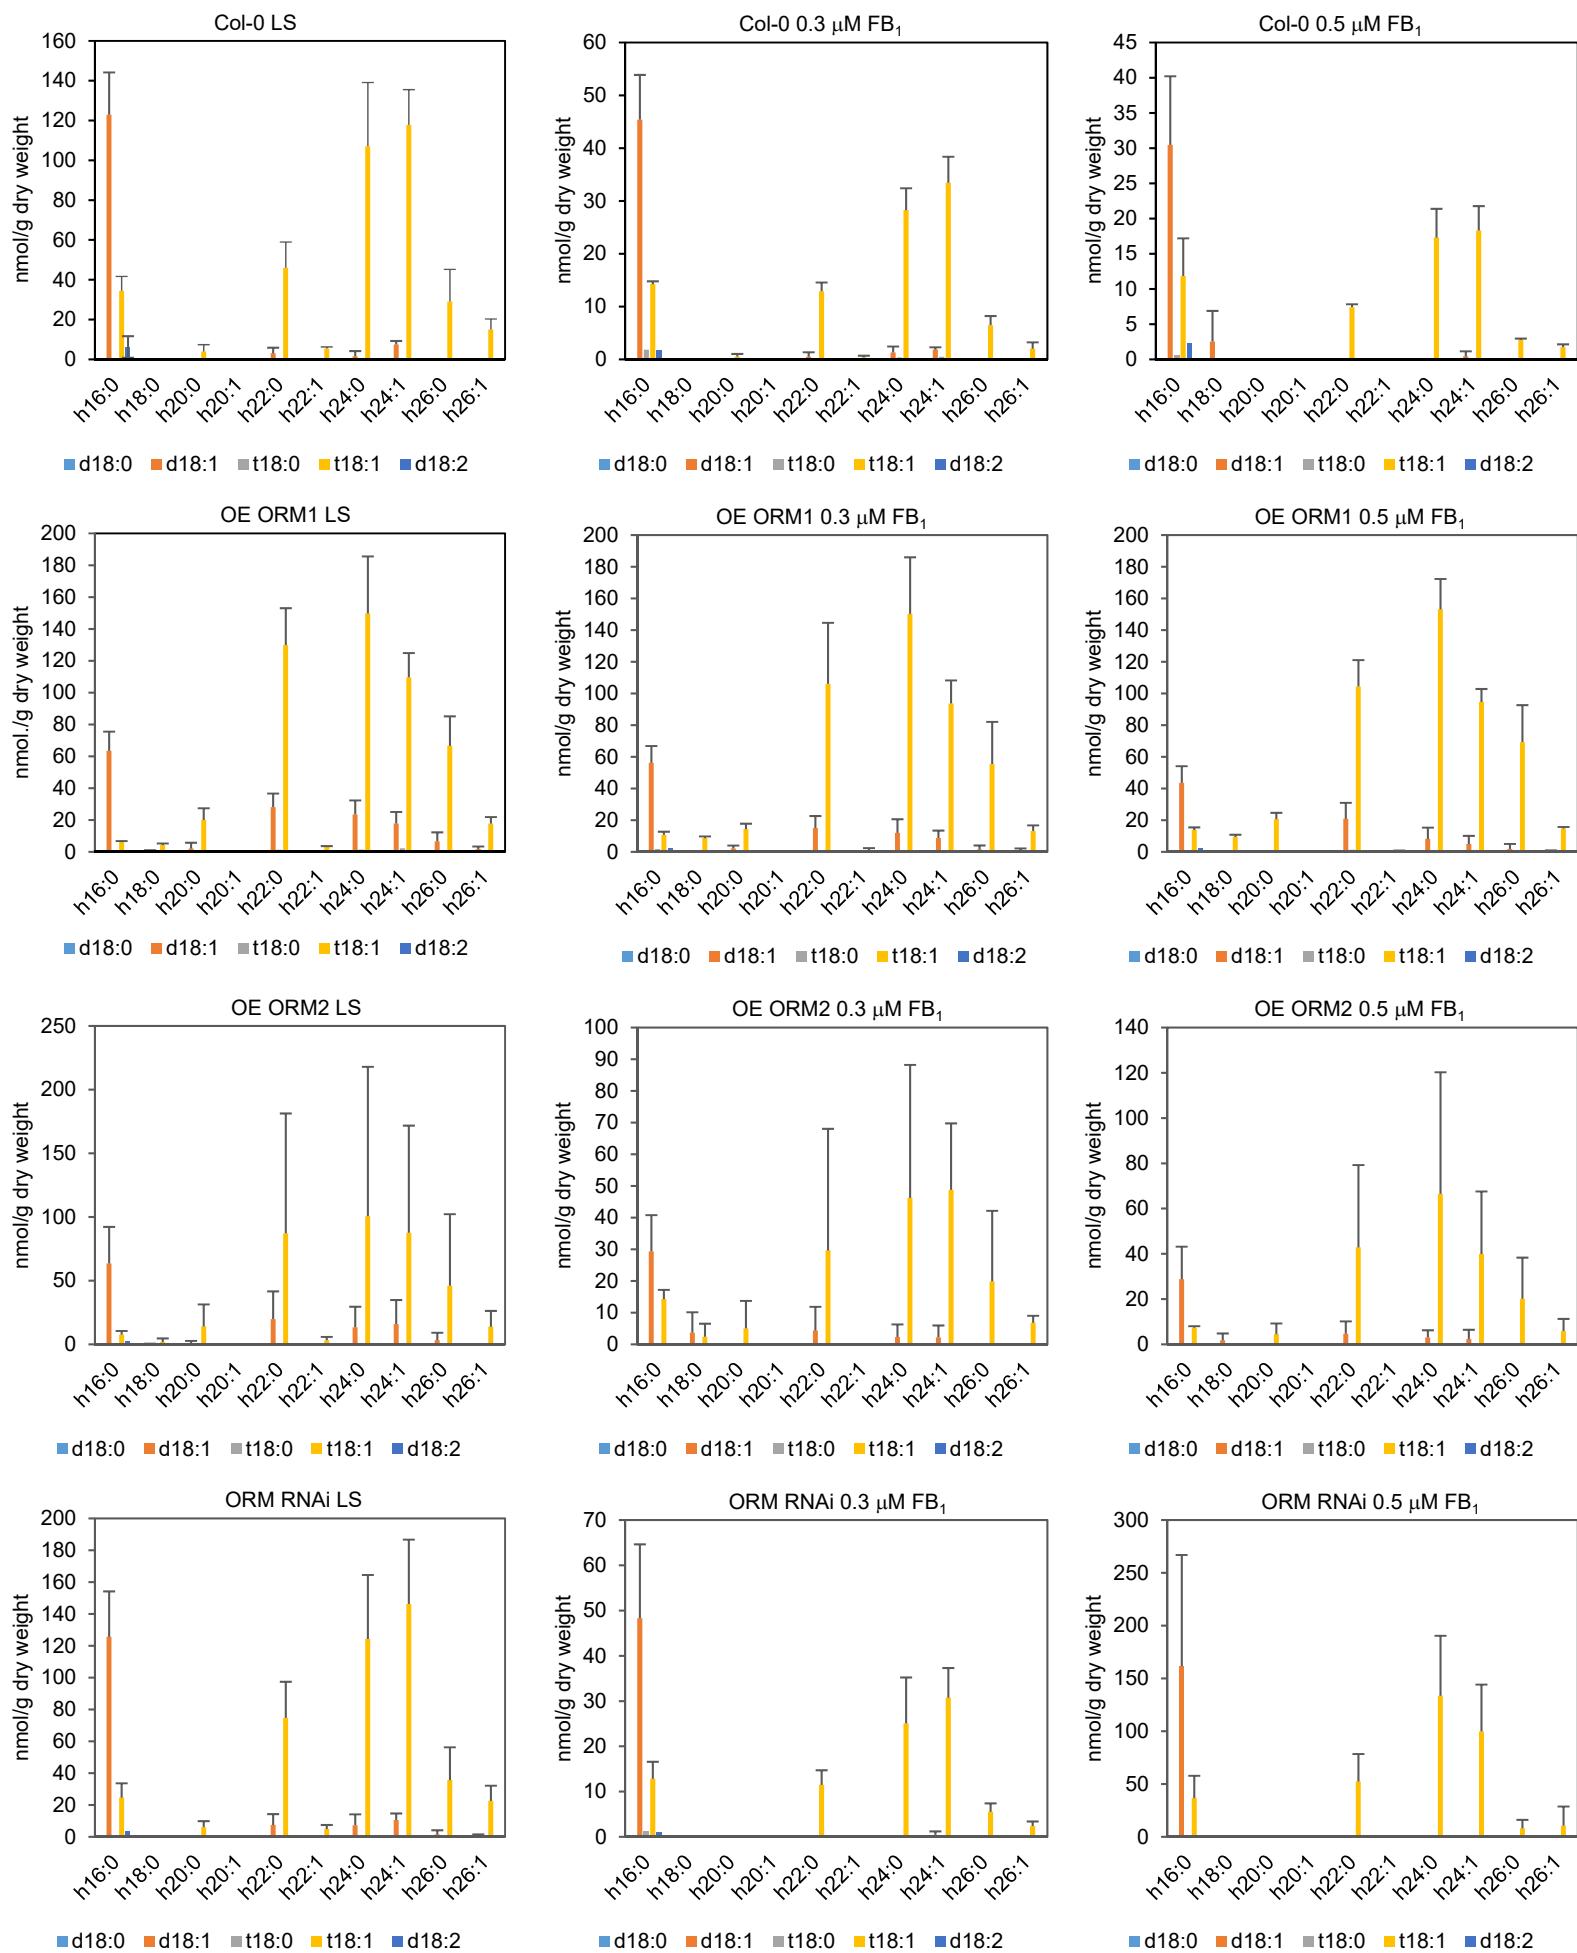

**Figure S5.** Glucosylceramide (GlcCer) profile for Col-0 and *AtORM* overexpression and RNAi lines grown on LS ±FB<sub>1</sub>. n=3 independent analyses of seedlings ± SD.

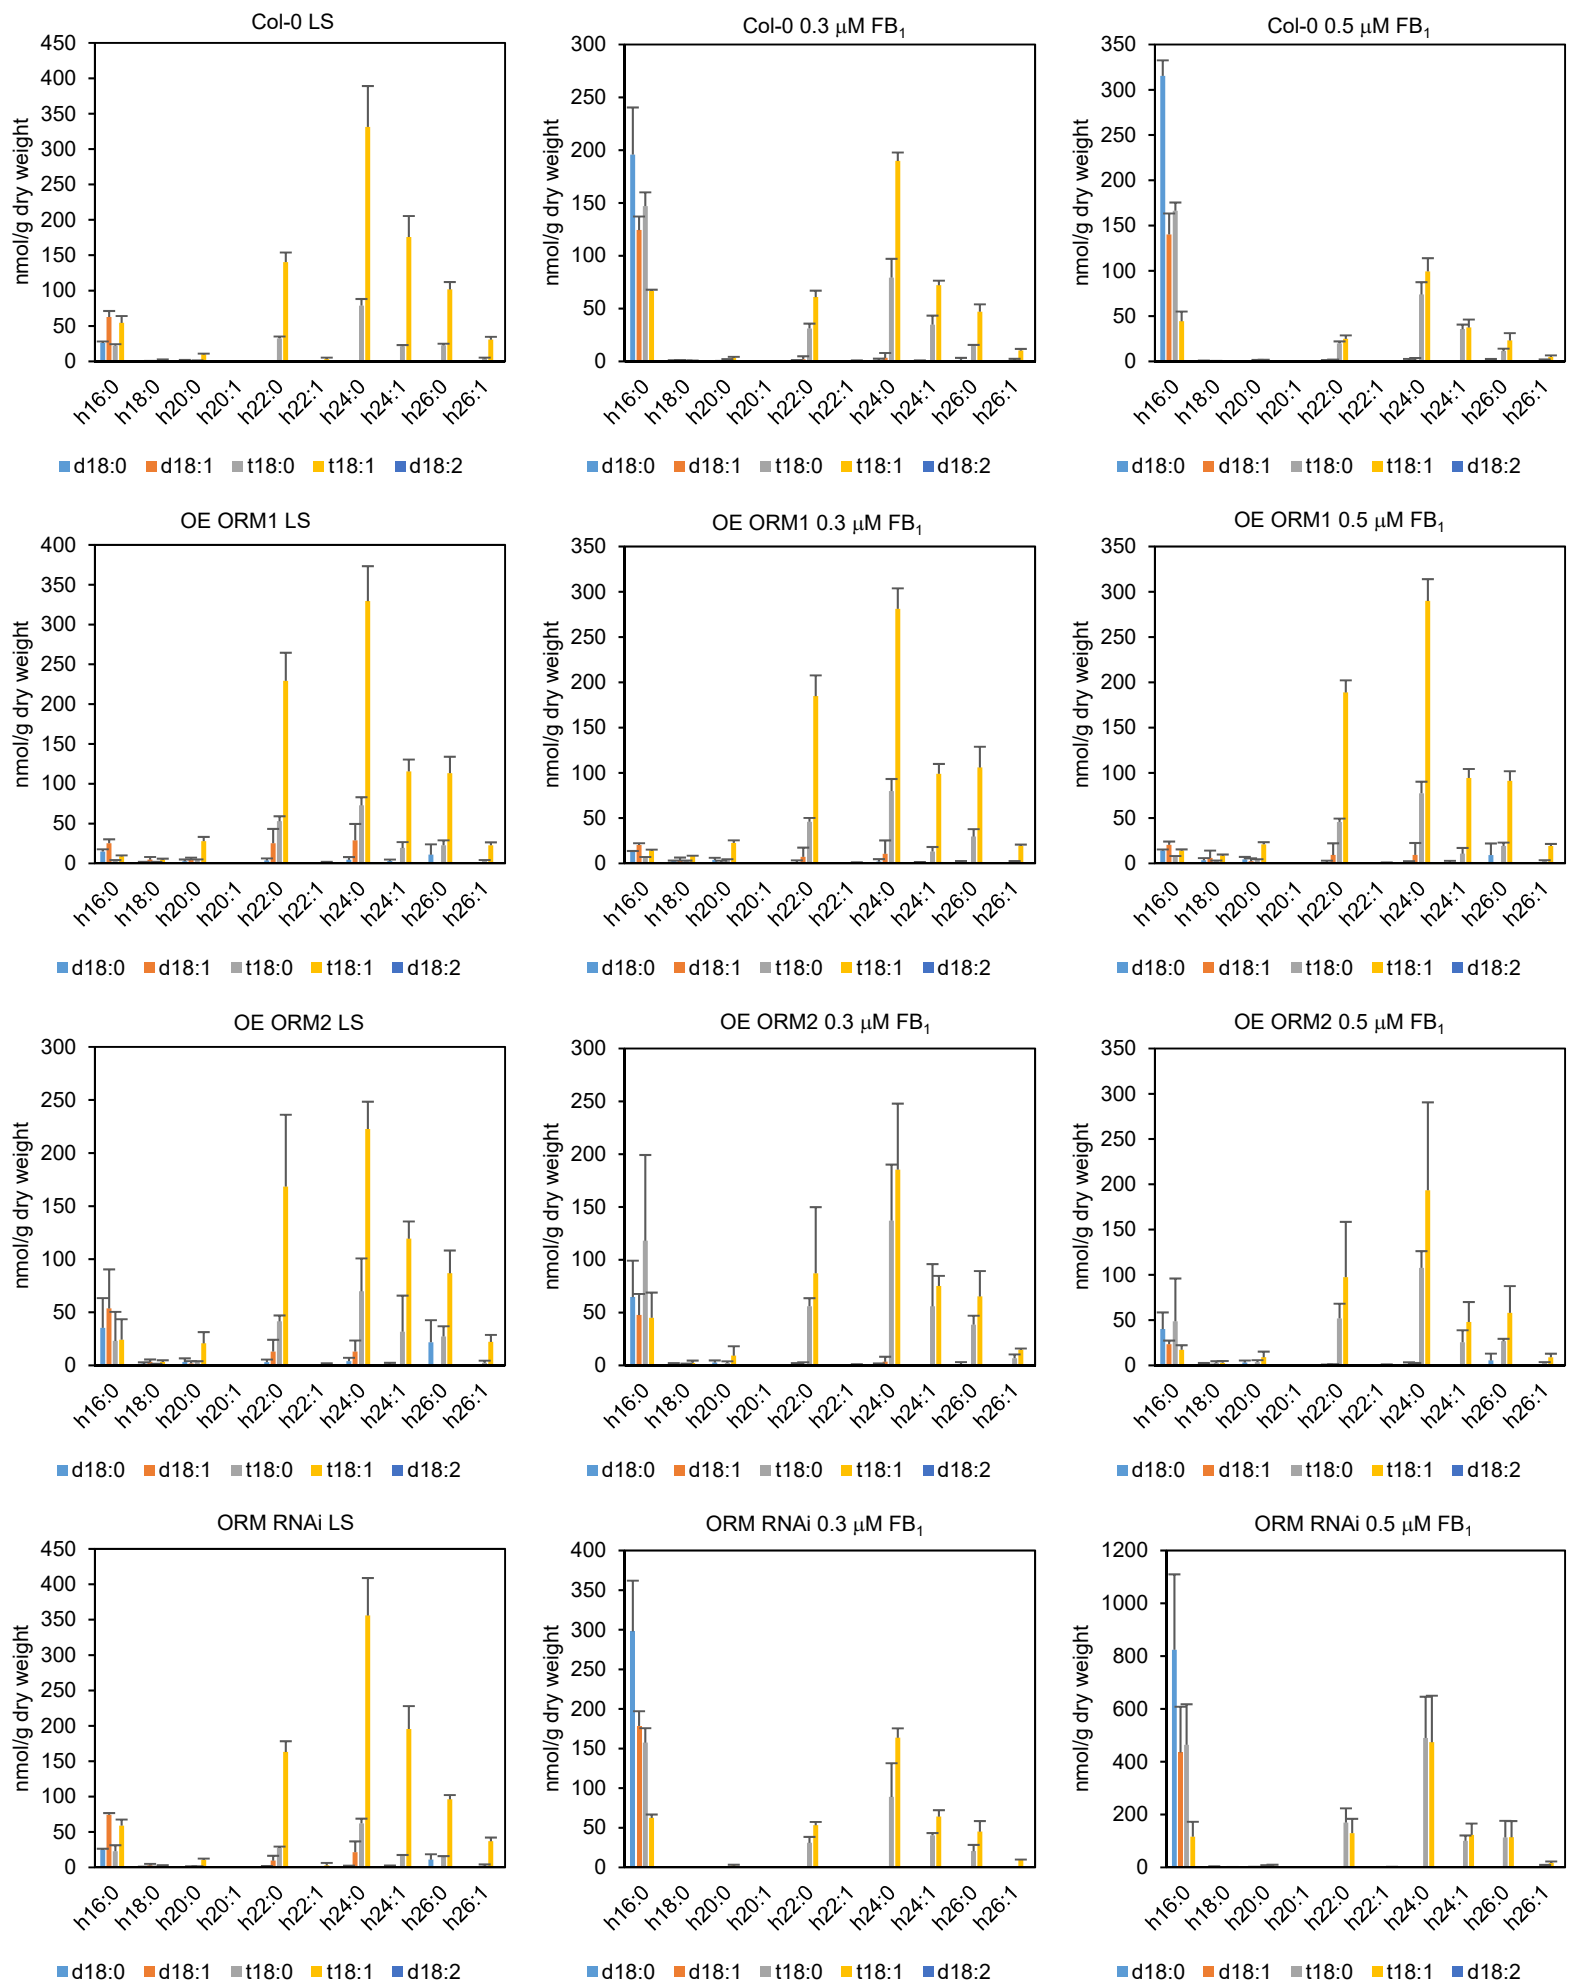

**Figure S6.** Glycosylinositolphosphorylceramide (GIPC) profile for Col-0 and AtORM overexpression and RNAi lines grown on LS  $\pm$  FB<sub>1</sub>. n=3 independent analyses of seedlings  $\pm$  SD.

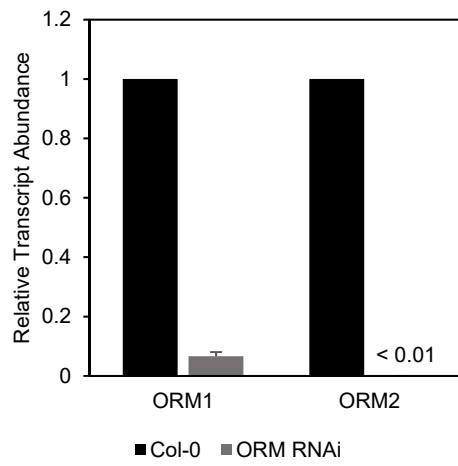

**Figure S7.** qPCR analysis of ORM RNAi lines. RNA was extracted from leaf tissue of 3 week old plants. As shown, both *AtORM1* and *AtORM2* transcripts were suppressed.



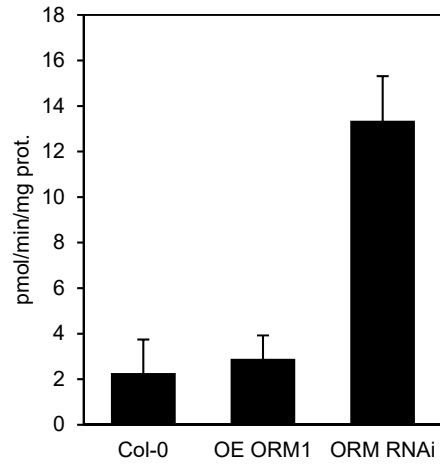

**Figure S8.** SPT activity from root microsomes of wild-type and transgenic plants. ORM RNAi suppression lines show increased SPT activity when compared to wild type. ORM overexpression lines do not show significantly reduced SPT activity when compared to wild type.
